# Supplementary material for: Factors Influencing Isolation Behavior of Dogs: A Holder-Based Questionnaire and Behavioral and Saliva Cortisol Responses during Separation
Source: MDPI journal article supplement (doi:10.3390/ani13233735), 2023-12-02
Supplement: s1 [file s1]

**Figure S1.** Instructions video recording.

## Leitfaden zur Videoaufnahme

erstellt von: Jennifer Silbermann

---

### **Technische Voraussetzungen**

Da Ihr Hund für mehrere Stunden aufgenommen werden soll, ist es wichtig, dass das Medium über ausreichend Speicherplatz verfügt. Je nach Gerät und Format können Dateien von bis zu 12 GB entstehen. Am einfachsten ist es ein Notebook mit integrierter Kamera zu nutzen. Tablet oder Handy können ebenso verwendet werden, vorausgesetzt es ist genügend Speicherplatz und stetige Stromzufuhr vorhanden.

---

### **Probelauf**

Damit am Aufnahmetag nichts schief geht, empfehle ich dringend die Technik vorher einmal Probe laufen zu lassen. Bestenfalls nehmen Sie dazu über 6 Stunden auf und kontrollieren danach, ob alles geklappt hat. Manche Geräte besitzen leider eine maximale Aufnahmedauer, die unter 6 Stunden liegt. Auch deshalb ist ein vorheriger Test sehr sinnvoll.

Zur Aufnahme können Sie die bereits vorhandene Kamera-Software Ihres Gerätes nutzen, aber auch die Verwendung von kostenloser Software, wie VLC-Player, sind möglich.

Falls Sie vor oder nach der Aufnahme nach einem Speicherformat gefragt werden, wählen Sie gerne MP4 aus. Falls nicht, ist das auch in Ordnung, dann einfach nur speichern.

Ganz wichtig: Gerät dauerhaft am Strom lassen. Auch der Stromsparmodus sollte ausgeschaltet sein.

---

### **Platzierung der Kamera**

Falls sich Ihr Hund nur in einem Raum frei bewegen kann, platzieren Sie die Kamera bitte so, dass ein möglichst großer Bereich des Raumes sichtbar ist.

Darf sich Ihr Hund, während der Trennung, gänzlich frei in allen Räumen bewegen, platzieren Sie die Kamera bitte so, dass der Ort, an dem sich Ihr Hund Ihrer Vermutung nach meistens aufhält, aufgenommen wird.

Wichtig ist, dass auch der Ton mit aufgezeichnet wird, damit Lautäußerungen wie Bellen oder Heulen, in die Auswertung einfließen können.

Es ist außerdem bedeutend, dass die Begrüßung zwischen Ihnen und Ihrem Hund nach Ihrer Rückkehr gut sichtbar ist. Sollte die Kamera den Eingangsbereich nicht mit abbilden, bitte ich darum den Hund, soweit / so schnell wie möglich, im gefilmten Bereich zu begrüßen.

Falls Ihnen sogar zwei Kameras zur Verfügung stehen, können Sie gern eine Kamera im Lieblingsraum und eine im Eingangsbereich platzieren. Dann müssen Sie sich über Ihren Standort während der Begrüßung keine Gedanken machen.

---

### **Ablauf**

Wir sind daran interessiert herauszufinden, ob sich das Verhalten Ihres Hundes ändert, wenn die Dauer der Trennung steigt.

Ihr Hund wird deshalb über drei Zeitintervalle aufgenommen: 2, 4 und 6 Stunden.

Inklusive der 10-minütigen Aufnahme vor Ihrem Verlassen und nach Ihrer Rückkehr, ergeben sich Aufnahmezeiten von mindestens 2:20, 4:20 und 6:20.

Nötige Angaben halten Sie bitte im Protokoll fest.

### **Starten der Aufnahme**

Die Aufnahme startet mindestens 10 Minuten vor Ihrem Verlassen, so dass wir analysieren können, wie sich Ihr Hund in dieser Zeit verhält. Führen Sie während dieser Phase Ihre normalen Routinen aus und verhalten Sie sich wie sonst auch.

Danach bleibt Ihr Hund für 2, 4 oder 6 Stunden allein. Mit welcher Dauer Sie beginnen, bleibt Ihnen überlassen.

### **Beendigung der Aufnahme**

Die Aufnahme stoppt mindestens 10 Minuten nach Ihrer Rückkehr. Uns interessiert besonders wie sich Ihr Hund während der Begrüßung und kurze Zeit danach verhält. Machen Sie auch hier einfach alles wie immer. Falls die Kamera nicht so platziert ist, dass auch der Eingangsbereich abgebildet wird, ist es wichtig darauf zu achten sich zügig im gefilmten Bereich aufzuhalten, so dass das Begrüßungsverhalten so umfassend wie möglich erfasst werden kann.

---

## **Benennung Datei**

Ihre Initialen + Ihres Hundes + Intervalldauer

Beispiel: Max Mustermann hat seinen Hund Peppy über 6:20 Stunden allein Zuhause aufgenommen:  
MMP6

---

## **Ggf. Komprimieren**

Falls Ihre Internetverbindung keine hohe Übertragungsrate hat und Sie die Zeit des Hochladens gern verkürzen möchten, ist es möglich das Video im Vorfeld zu verkleinern. Dazu gibt es verschiedene kostenfreie Programme. Mehr Infos dazu finden Sie in der Datei „Komprimierung\_Videos“.

---

## **Hochladen der Videos**

Die Videos werden auf einem sicheren Nextcloud-Server gesammelt und abgerufen. Nur der Admin hat darauf Zugriff. Nach Beendigung der Projektarbeit werden alle Videos gelöscht.

Unter folgendem Link können Sie Ihre Aufnahmen hochladen:

<https://rv2950.1blu.de/index.php/s/rgjiYXtwJBF3WnT>

Die Upload-Dauer wird einige Zeit (mehrere Stunden) in Anspruch nehmen. Es empfiehlt sich daher dies zu machen, wenn das Gerät für längere Zeit angeschaltet bleiben kann.

**Alternativ** ist es möglich die Daten auf einem Stick im Paket mit den Speichelproben zu schicken. Ihr Stick wird Ihnen dann zeitnahe per Brief zurückgesendet.

---

## **Zeitraum**

Da das Projekt an Fristen gebunden ist, können nur Aufnahmen berücksichtigt und ausgewertet werden, die bis einschließlich 22.04.2022 hochgeladen / zugesendet wurden.

---

Bei jeglichen Fragen oder Problemen wenden Sie sich gerne an **projectconnect@outlook.de**.

**Figure S2.** Instructions salivary sampling.

### Leitfaden zur Speichelproben-Entnahme

erstellt von: Jennifer Silbermann

---

Wir sind daran interessiert herauszufinden, ob sich die Konzentration des Stresshormons Cortisol Ihres Hundes ändert, wenn die Dauer der Trennung steigt. Dazu werden Speichelproben Ihres Hundes genommen.

---

#### **vorheriges Training**

Um ein gutes Ergebnis der Speichelprobe zu erreichen, empfiehlt es sich **mindestens 7 Tage** vor der ersten Testung, **3 bis 5 Mal täglich** mit dem Hund zu trainieren.

Während der Durchführung macht es sich am besten, wenn ihr Hund sitzt und Sie sitzen/hocken. Anfangs wird die Watte nur gezeigt, noch nicht ins Maul gelegt, Sie loben Ihren Hund verbal und der Hund bekommt eine Belohnung, sobald dieser sich der Watterolle in irgendeiner Form nähert oder diese berührt. Nach einigen Wiederholungen kann es nun einen Schritt weiter gehen. Nehmen Sie die Watterolle und legen Sie diese in die Backentasche (siehe Abbildung 6 unter „Vorgehen“). Falls Sie befürchten, dass Ihr Hund die Watterolle verschlucken könnte, ist es auch möglich, dass Sie diese am Ende festhalten, während sich das andere Ende in der Backentasche befindet. Dort lassen Sie sie nur für einen kurzen Moment, entnehmen diese, loben Ihren Hund verbal (falls Sie schon ein Markersignal konditioniert haben, können Sie gerne auch dieses nutzen) und belohnen den Hund gleich danach mit Futter.

Bewahren Sie das Leckerli während der Testung bitte nicht einsehbar für Ihren Hund auf, damit dieser durch den Anblick nicht zu unruhig wird.

Die Zeit bis die Watterolle entnommen wird, wird in kleinen Schritten von **etwa 5-10 Sekunden** verlängert, vorausgesetzt der Hund zeigt keine Unruhe, während die Watte in der Backentasche ist.

Sobald Ihr Hund die Watterolle für **mindestens 30 Sekunden** in der Backentasche toleriert, nutzen Sie die **letzten 5 Sekunden** bitte dazu, dass Sie die Watterolle unter der Zunge des Hundes entlangführen (dort sammelt sich besonders viel Speichel).

Der Hund sollte letztendlich kennen, dass die Watte mindestens **1 bis bestmöglich 2 Minuten** im Maul bleibt. Falls die Rolle einmal ausgespuckt wird oder herausfällt, kann diese einfach wieder nachgelegt werden.

*Bitte hören Sie mit dem Training bestenfalls auf bevor Ihr Hund unruhig wird.*

Ihr Hund sollte die Watterolle nach dem Training mit Futter in Verbindung bringen und damit positiv verknüpft haben. Damit es dabei bleibt, bitten wir darum, die **Testtage der drei verschiedenen Intervalle nicht hintereinander** zu legen. Der Hund könnte durch den vorangegangenen Tag lernen, dass Watterolle in der Maultasche bedeutet, dass der Mensch danach geht. Daher könnte schon der Anblick der Watterolle das Stresshormon beeinflussen.

Lassen Sie deswegen bitte zwischen den „echten“ Testtagen **mindestens zwei Tage ohne Testung stehen und konditionieren** Sie in dieser Zeit noch einmal nach (1-2 Minuten

Watterolle + Belohnung UND Sie bleiben danach bei Ihrem Hund und haben eine entspannte Zeit).

---

## **Ablauf**

Anders als bei den Videoaufnahmen, werden die Speichelproben **nur für zwei Intervalle** gemessen: **2 und 6 Stunden**.

Dazu ist es nötig Ihrem Hund am Morgen der Testung, vor und nach dem Alleinbleiben Speichelproben zu entnehmen.

Der **Morgenwert** sollte möglichst zwischen **7 bis 10 Uhr** genommen werden. Ihr Hund sollte vor der Speichelprobe bestenfalls noch nichts gemacht haben (Trinken, Fressen, Bewegung).

**Vor** dem Alleinbleiben wird eine weitere Probe genommen. Nehmen Sie diese bitte bevor Sie beginnen sich zum Weggehen fertig zu machen.

**Nachdem** Ihr Hund 2 oder 6 Stunden allein Zuhause war, wird die letzte Probe genommen. Begrüßen Sie Ihren Hund gerne so wie sonst auch und beginnen danach mit der Speichelprobenentnahme.

Ihr Hund kann durch die Speichelproben-Entnahme hormonell beeinflusst werden. Daher ist es wichtig, dass die Entnahme (Schritt 6 s.u.) **nicht länger als 4 Minuten** dauert, um mögliche Verfälschungen der Ergebnisse zu vermeiden. Falls es doch einmal länger dauern sollte, vermerken Sie dies bitte auf dem beigegeführten Protokoll.

## **Wichtige Hinweise:**

- Nehmen Sie die Probe **am Morgen** bevor Ihr Hund gefressen, getrunken oder sich vermehrt bewegt hat

- Innerhalb von 30 Minuten vor der Messung **vor dem Alleinbleiben**, sollte Ihr Hund **nichts trinken und fressen**
- Innerhalb von 60 Minuten vor der Messung **vor dem Alleinbleiben**, sollte Ihr Hund sich **nicht intensiv bewegen**
- Watterolle für **mind. 1 bis bestmöglich 2 Minuten** in Backentasche des Hundes
- Schritt 6 sollte **nicht länger als 4 Minuten** dauern, sonst können Ergebnisse beeinflusst werden
- Vergessen Sie nicht Ihren Hund nach Speichelentnahme zu **belohnen**
- Füllen Sie nach jeder Speichelproben-Entnahme das **Protokoll** aus
- Die im Protokoll erfasste **Entnahmedauer** meint die Dauer für Schritt 6
- Sollte etwas anders laufen als gedacht oder es **besondere Vorkommnisse** vor der Messung geben (bsp. Streit unter Artgenossen, läufige Hündin beim letzten Gassigang, Futter kurz vor Speichelprobe, usw.), teilen Sie uns dies bitte im **Bemerkungsfeld** des Protokolls mit
- Legen Sie die Proben schnellstmöglich ins **Tiefkühlfach**

Und so geht's:

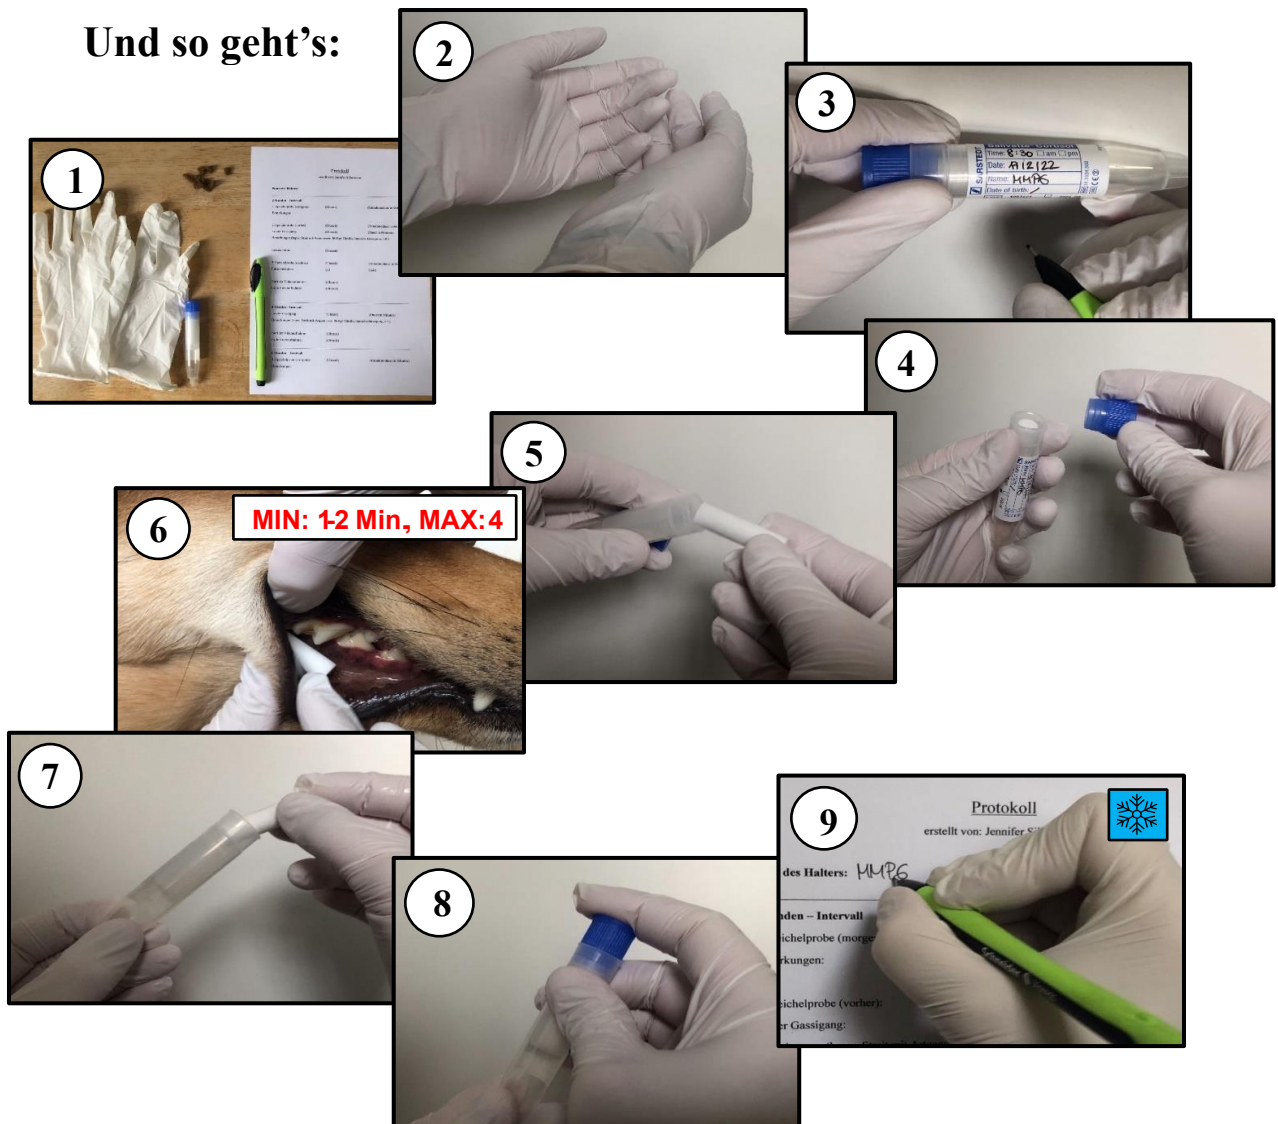

### Beschriftung der Proben

Beschriften Sie die Röhrchen bitte mit Ihrer ID:

Ihre Initialen + Ihres Hundes + Intervalldauer

Beispiel: Max Mustermann hat seinen Hund Peppy über 6 Stunden allein Zuhause gelassen und nimmt nun eine Speichelprobe: MMP6

### Versenden der Proben

**Da für zwei Intervalle und je Intervall drei Proben genommen werden, sollten am Ende sechs Speichelproben vorhanden sein.**

Das Versandmaterial und Materialien zur Probenentnahme wird Ihnen postalisch zugestellt. Darin enthalten sind sieben Probenröhrchen inkl. Watterolle (1x Trainingsprobenröhrchen, 6x Versuchsprobenröhrchen), Einweghandschuhe, alle nötigen Handzettel und Porto für den Rückversand. Bitte nutzen Sie für den Rückversand dieselbe Kartonage und senden alle 6 Proben gesammelt an Jennifer Silberman, Steigerstr. 33, 99096 Erfurt als Maxibrief zurück. Die Proben sollten erst aus dem Tiefkühler genommen werden, wenn Sie die Proben versenden möchten, damit diese nur wenige Tage ungekühlt unterwegs sind. Sind die Proben mehr als 4 Tage ungekühlt, kann das Ergebnis verfälscht werden. Um das zu vermeiden, wird dringend empfohlen nicht vor dem Wochenende, sondern Anfang der Woche zu versenden.

---

### **Zeitraum**

Da das Projekt an Fristen gebunden ist, können nur Proben berücksichtigt und ausgewertet werden, die bis einschließlich 22.04.2022 eingesendet wurden.

---

Bei jeglichen Fragen oder Problemen wenden Sie sich gerne an **projectconnect@outlook.de**.

**Figure S3.** Protocol.

### Protokoll

erstellt von: Jennifer Silberman

**Name des Halters:**

Medikamente:

Erkrankungen:

---



## 2 Stunden – Intervall

1. Speichelprobe (morgens): (Uhrzeit) (Entnahmedauer in Minuten)

Bemerkungen:

2. Speichelprobe (vorher): (Uhrzeit) (Entnahmedauer in Minuten) letzter

Gassigang: (Uhrzeit) (Dauer in Minuten)

Bemerkungen (bspw. Streit mit Artgenossen, läufige Hündin, intensive Bewegung, o.ä.):

letztes Futter: (Uhrzeit)

Start der Videoaufnahme: (Uhrzeit)

3. Speichelprobe (nachher): (Uhrzeit) (Entnahmedauer in Minuten)

Futter verfügbar während Trennung: (ja) (nein)

Ende Videoaufnahme: (Uhrzeit)

---

## 4 Stunden – Intervall

letzter Gassigang: (Uhrzeit) (Dauer in Minuten)

Bemerkungen (bspw. Streit mit Artgenossen, läufige Hündin, intensive Bewegung, o.ä.):

Start der Videoaufnahme: (Uhrzeit)

Ende Videoaufnahme: (Uhrzeit)

---

## 6 Stunden – Intervall

|                                                                                       |           |                                    |
|---------------------------------------------------------------------------------------|-----------|------------------------------------|
| 1. Speichelprobe (morgens):                                                           | (Uhrzeit) | (Entnahmedauer in Minuten)         |
| Bemerkungen:                                                                          |           |                                    |
|                                                                                       |           |                                    |
| 2. Speichelprobe (vorher):                                                            | (Uhrzeit) | (Entnahmedauer in Minuten) letzter |
| Gassigang:                                                                            | (Uhrzeit) | (Dauer in Minuten)                 |
| Bemerkungen (bspw. Streit mit Artgenossen, läufige Hündin, intensive Bewegung, o.ä.): |           |                                    |
|                                                                                       |           |                                    |
| letztes Futter:                                                                       | (Uhrzeit) |                                    |
|                                                                                       |           |                                    |
| Start der Videoaufnahme:                                                              | (Uhrzeit) |                                    |
|                                                                                       |           |                                    |
| 3. Speichelprobe (nachher):                                                           | (Uhrzeit) | (Entnahmedauer in Minuten)         |
|                                                                                       |           |                                    |
| Futter verfügbar während Trennung:                                                    | (ja)      | (nein)                             |
|                                                                                       |           |                                    |
| Ende Videoaufnahme:                                                                   | (Uhrzeit) |                                    |

**Table S1.** Risk factors for separation-related behavior.

| Author             | Year | Factor                                    |
|--------------------|------|-------------------------------------------|
| Konok et al.       | 2019 | owners with few worries during separation |
| Konok et al.       | 2019 | insecure dogs                             |
| Flannigan & Dodman | 2001 | single owners                             |
| Flannigan & Dodman | 2001 | intact dogs                               |
| McGreevy & Masters | 2008 |                                           |
| Storengen et al.   | 2014 | castrated dogs                            |
| Bradshaw et al.    | 2002 | male dogs                                 |
| McGreevy & Masters | 2008 |                                           |
| McGreevy & Masters | 2008 | dogs from pet shops                       |
| McGreevy & Masters | 2008 | number of adult females in household      |
| Mendl et al.       | 2010 | pessimism in dog                          |
| Konok et al.       | 2011 | intensity of greeting behavior of dog     |
| Pongrácz et al.    | 2017 | breed                                     |
| Tiira et al.       | 2016 | comorbidity phobias                       |
| Overall et al.     | 2011 |                                           |
| Konok et al.       | 2011 | no calming down after owner's return      |

|                   |      |                              |
|-------------------|------|------------------------------|
| McCrave           | 1991 | time in shelter              |
| Scanlon et al.    | 2022 | frequency of separation      |
| Harvey et al.     | 2022 | reduced separation duration  |
| Palestrini et al. | 2010 | time of adoption             |
| Palestrini et al. | 2010 | early separation from mother |

**Table S2.** Separation questionnaire.

| <b>Frage</b>                                                                                                                       | <b>Antwortmöglichkeiten</b>                                                                       |
|------------------------------------------------------------------------------------------------------------------------------------|---------------------------------------------------------------------------------------------------|
| Welches Geschlecht hat Ihr Hund? Ist er kastriert/sterilisiert?<br>(Mehrfachantwort möglich)                                       | weiblich, männlich, kastriert, sterilisiert, Hormonchip (nicht länger als 12 Monate)              |
| Wie alt ist Ihr Hund?                                                                                                              | unter 4 Monate, 4 Monate bis 1 Jahr, 2 bis 5 Jahre, 6 bis 9 Jahre, 10 bis 13 Jahre, über 13 Jahre |
| Welcher Rasse gehört Ihr Hund an? Oder ist es ein Mischling aus ...?<br>(Falls Rasse(n) nicht bekannt, bitte "Mischling" angeben.) | frei                                                                                              |
| Bitte geben Sie die Größe Ihres Hundes in cm (Schulterhöhe) an:<br>(Bitte nur Zahl angeben, z. B. 30)                              | frei                                                                                              |

| Frage                                                                                                                            | Antwortmöglichkeiten                                                                                                                                                                                                                      |
|----------------------------------------------------------------------------------------------------------------------------------|-------------------------------------------------------------------------------------------------------------------------------------------------------------------------------------------------------------------------------------------|
| Bitte geben Sie das ungefähre Gewicht des Hundes in Kilogramm an:<br>(Bitte nur Zahl angeben, z. B. 25)                          | frei                                                                                                                                                                                                                                      |
| Woher haben Sie Ihren Hund?                                                                                                      | Züchter, Tierschutz - Inland/Tierheim, Tierschutz - Ausland, Bekannte/Verwandte, Sonstiges:                                                                                                                                               |
| Falls Ihr Hund aus dem Tierheim/Tierschutz stammt, wissen Sie wie lange dieser dort war?                                         | bis zu 1 Monat, bis zu 3 Monate, bis zu 6 Monate, bis zu 1 Jahr, mehr als 1 Jahr, weiß ich nicht                                                                                                                                          |
| Wie lange ist Ihr Hund schon bei Ihnen?                                                                                          | unter 1 Monat, 1 bis 3 Monate, 4 bis 6 Monate, 7 bis 12 Monate, über 1 bis 3 Jahre, 4 bis 5 Jahre, mehr als 5 Jahre                                                                                                                       |
| Wie viele Halter gab es vor Ihnen?                                                                                               | ich bin Ersthalter, 1 Halter, 2 Halter, 3 bis 4 Halter, mehr als 4 Halter, weiß ich nicht                                                                                                                                                 |
| Wie alt war Ihr Hund als er zu Ihnen kam?                                                                                        | unter 1 Monat, 1 bis 2 Monate, über 2 bis 3 Monate, über 3 bis 5 Monate, 6 Monate bis 1 Jahr, 2 bis 5 Jahre, 6 bis 10 Jahre, 11 bis 15 Jahre, älter als 15 Jahre, weiß ich nicht                                                          |
| Welchem Geschlecht ordnen Sie sich zu?                                                                                           | männlich, weiblich, divers                                                                                                                                                                                                                |
| Wie alt sind Sie?                                                                                                                | 18-25, 26-30, 31-40, 41-50, 51-60, älter als 61                                                                                                                                                                                           |
| Wie viele männliche Erwachsene leben in Ihrem Haushalt?                                                                          | frei                                                                                                                                                                                                                                      |
| Wie viele weibliche Erwachsene leben in Ihrem Haushalt?                                                                          | frei                                                                                                                                                                                                                                      |
| Wie viele Kinder (unter 14 Jahren) leben in Ihrem Haushalt?                                                                      | frei                                                                                                                                                                                                                                      |
| In welcher Art Unterkunft leben Sie?<br>(Mehrfachantwort möglich)                                                                | Haus, Wohnung, mit Garten, Sonstiges:                                                                                                                                                                                                     |
| Gab es in den letzten 12 Monaten in Ihrem Leben und in dem Leben des Hundes wichtige Veränderungen?<br>(Mehrfachantwort möglich) | nein, Umzug, Scheidung/Trennung, Home Office, veränderte Arbeitszeiten, weniger Gassi als sonst, neuer Hund im Haushalt, Verlust eines tierischen Mitbewohners (Hund oder Katze), Geburt eines Kindes, Vorbesitzer verstorben, Sonstiges: |
| Lebt Ihr Hund mit einem oder mehreren Hund(en) zusammen?                                                                         | ja, nein                                                                                                                                                                                                                                  |
| Lebt Ihr Hund mit anderen Tierarten zusammen? Wenn ja, welche?                                                                   | nein, Katze, Vogel, Nagetier, Sonstiges:                                                                                                                                                                                                  |

| Frage                                                                                                                                                  | Antwortmöglichkeiten                                                                                                                                                      |
|--------------------------------------------------------------------------------------------------------------------------------------------------------|---------------------------------------------------------------------------------------------------------------------------------------------------------------------------|
| Lassen Sie Ihren Hund manchmal alleine Zuhause?                                                                                                        | ja, nein                                                                                                                                                                  |
| Wie viele Tage in der Woche bleibt Ihr Hund alleine Zuhause?                                                                                           | 1 bis 7 Tage                                                                                                                                                              |
| Wie lange lassen Sie Ihren Hund ohne Unterbrechung alleine Zuhause?                                                                                    | wenige Minuten, bis 1,5 Stunden, bis 2,5 Stunden, bis 3,5 Stunden, bis 4,5 Stunden, bis 5,5 Stunden, bis 6,5 Stunden, mindestens 8 Stunden                                |
| Wo befindet sich Ihr Hund während dieser Zeit?<br>(Mehrfachantwort möglich)                                                                            | in einer geschlossenen Hundebox, Zugang zur/zum gesamten Wohnung/Haus, ausschließlich in einem Raum, mit Zugang nach draußen, ausschließlich draußen, Zwinger, Sonstiges: |
| Wie lange ist die Dauer zwischen dem letzten Gassigang und dem Alleinlassen des Hundes?                                                                | bis zu 5 Minuten, bis zu 30 Minuten, bis zu 1 Stunde, bis zu 3 Stunden, bis zu 4 Stunden, bis zu 5 Stunden, bis zu 6 Stunden, bis zu 7 Stunden, mehr als 7 Stunden        |
| Wie lange dauert der letzte Gassigang vor dem Alleinlassen Zuhause (in Minuten)?<br>(Bitte keine Zeitspannen, sondern einen Durchschnittswert angeben) | frei                                                                                                                                                                      |
| Hinterlassen Sie Ihrem Hund eine Beschäftigung für die erste Zeit des Alleinebleibens? Wenn ja, welche?<br>(Mehrfachantwort möglich)                   | nein, Futter, Spielzeug, Sonstiges:                                                                                                                                       |
| Hat Ihr Hund einen anderen Hund, eine Katze oder ein anderes Haustier um sich, während er alleine Zuhause ist?<br>(Mehrfachantwort möglich)            | nein, Hund, Katze, Sonstiges:                                                                                                                                             |
| Für welche Dauer würden Sie Ihren Hund maximal alleine lassen?                                                                                         | wenige Minuten, bis zu 30 Minuten, bis zu 1 Stunde, bis zu 3 Stunden, bis zu 5 Stunden, bis zu 7 Stunden, bis zu 9 Stunden, mehr als 9 Stunden                            |
| Wie fühlen Sie sich, während Sie Ihren Hund alleine Zuhause lassen?<br>(1 = sehr ruhig, 2 = eher ruhig, 3 = eher unruhig, 4 = sehr unruhig)            | 1 bis 4                                                                                                                                                                   |
| Wie glauben Sie fühlt sich der Hund, wenn Sie ihn alleine Zuhause lassen?<br>(1 = sehr ruhig, 2 = eher ruhig, 3 = eher unruhig, 4 = sehr unruhig)      | 1 bis 4                                                                                                                                                                   |

| Frage                                                                                                                                                                                                                                                                       | Antwortmöglichkeiten                                                                                                                                                                                                                                                                                                                                                                                                                                                                                                                                                                                                                                                                                                                                                                                                                                                                                                                                                                                            |
|-----------------------------------------------------------------------------------------------------------------------------------------------------------------------------------------------------------------------------------------------------------------------------|-----------------------------------------------------------------------------------------------------------------------------------------------------------------------------------------------------------------------------------------------------------------------------------------------------------------------------------------------------------------------------------------------------------------------------------------------------------------------------------------------------------------------------------------------------------------------------------------------------------------------------------------------------------------------------------------------------------------------------------------------------------------------------------------------------------------------------------------------------------------------------------------------------------------------------------------------------------------------------------------------------------------|
| Verabschieden Sie sich von Ihrem Hund bevor Sie Ihr Zuhause verlassen? Wenn ja, in welcher Form?                                                                                                                                                                            | nein, mit Worten, körperlich, mit Worten und körperlich                                                                                                                                                                                                                                                                                                                                                                                                                                                                                                                                                                                                                                                                                                                                                                                                                                                                                                                                                         |
| Wie würden Sie Ihre Verabschiedung gegenüber Ihrem Hund einschätzen, bevor Sie Ihr Zuhause verlassen?<br>(1 = ich verabschiede mich nicht, 2 = sehr ruhig, 3 = eher ruhig, 4 = eher intensiv, 5 = sehr intensiv)                                                            | 1 bis 5                                                                                                                                                                                                                                                                                                                                                                                                                                                                                                                                                                                                                                                                                                                                                                                                                                                                                                                                                                                                         |
| Zeigt Ihr Hund während Ihrer Abwesenheit oder während Sie sich zum Verlassen fertig machen eine oder mehrere der folgenden Verhaltensweisen?                                                                                                                                | Weinen (nie, selten, manchmal, häufig, immer, weiß ich nicht),<br>Bellen (nie, selten, manchmal, häufig, immer, weiß ich nicht),<br>Heulen (nie, selten, manchmal, häufig, immer, weiß ich nicht),<br>Knurren (nie, selten, manchmal, häufig, immer, weiß ich nicht),<br>starkes Speicheln (nie, selten, manchmal, häufig, immer, weiß ich nicht),<br>Urinieren (nie, selten, manchmal, häufig, immer, weiß ich nicht),<br>Kot absetzen (nie, selten, manchmal, häufig, immer, weiß ich nicht),<br>Zerstörung Gegenstände (nie, selten, manchmal, häufig, immer, weiß ich nicht),<br>Zittern (nie, selten, manchmal, häufig, immer, weiß ich nicht),<br>Unruhe (nie, selten, manchmal, häufig, immer, weiß ich nicht),<br>Aufregung (nie, selten, manchmal, häufig, immer, weiß ich nicht),<br>Lippenlecken (nie, selten, manchmal, häufig, immer, weiß ich nicht),<br>Gähnen (nie, selten, manchmal, häufig, immer, weiß ich nicht),<br>Fluchtverhalten (nie, selten, manchmal, häufig, immer, weiß ich nicht) |
| Begrüßen Sie Ihren Hund, wenn Sie nach Hause kommen? Wenn ja, wie?<br>Wie intensiv würden Sie Ihr Begrüßungsverhalten gegenüber Ihrem Hund bei Ihrer Rückkehr einschätzen?<br>(1 = ich begrüße nicht, 2 = sehr ruhig, 3 = eher ruhig, 4 = eher intensiv, 5 = sehr intensiv) | nein, mit Worten, körperlich, mit Worten und körperlich<br>1 bis 5                                                                                                                                                                                                                                                                                                                                                                                                                                                                                                                                                                                                                                                                                                                                                                                                                                                                                                                                              |
| Wie intensiv würden Sie das Begrüßungsverhalten Ihres Hundes einordnen, wenn Sie nach kurzer Zeit                                                                                                                                                                           | 1 bis 5                                                                                                                                                                                                                                                                                                                                                                                                                                                                                                                                                                                                                                                                                                                                                                                                                                                                                                                                                                                                         |

| Frage                                                                                                                                                                                                                                                             | Antwortmöglichkeiten                                                                                                                                                                           |
|-------------------------------------------------------------------------------------------------------------------------------------------------------------------------------------------------------------------------------------------------------------------|------------------------------------------------------------------------------------------------------------------------------------------------------------------------------------------------|
| (wenige Minuten) zurückkehren und Ihr Hund alleine Zuhause war?<br>(1 = begrüßt nicht, 2 = sehr ruhig, 3 = eher ruhig, 4 = eher intensiv, 5 = sehr intensiv)                                                                                                      |                                                                                                                                                                                                |
| Wie intensiv würden Sie das Begrüßungsverhalten Ihres Hundes einordnen, wenn Sie nach längerer Zeit (mehrere Stunden) zurückkehren und Ihr Hund alleine Zuhause war?<br>(1 = begrüßt nicht, 2 = sehr ruhig, 3 = eher ruhig, 4 = eher intensiv, 5 = sehr intensiv) | 1 bis 5                                                                                                                                                                                        |
| Wie schnell ist Ihr Hund schätzungsweise wieder in einem entspannten Zustand nachdem Sie zurück sind (in Minuten)?<br>(Bitte keine Zeitspannen, sondern einen Durchschnittswert angeben)                                                                          | frei                                                                                                                                                                                           |
| In welchem Alter wurde Ihr Hund von seiner Mutter getrennt?                                                                                                                                                                                                       | keine Trennung, sofort, innerhalb der ersten 4 Wochen, innerhalb der ersten 8 Wochen, innerhalb der ersten 12 Wochen, innerhalb der ersten 16 Wochen, mehr als 16 Wochen, weiß ich nicht       |
| Hat Ihr Hund eine spezielle Furcht oder Phobie? Wenn ja, welche?<br>(Mehrfachantwort möglich)                                                                                                                                                                     | nein, Geräusche, Gewitter/Sturm, Sonstiges:                                                                                                                                                    |
| Wie alt war Ihr Hund als Sie ihn das erste Mal alleine gelassen haben?                                                                                                                                                                                            | innerhalb der ersten 6 Wochen, innerhalb der ersten 12 Wochen, innerhalb der ersten 4 Monate, innerhalb der ersten 6 Monate, innerhalb des ersten Jahres, nach dem ersten Jahr, weiß ich nicht |
| Wie wurde der Hund an das Alleinebleiben gewöhnt?                                                                                                                                                                                                                 | keine Gewöhnung, schrittweise Gewöhnung                                                                                                                                                        |
| Wie lange gehen Sie mit Ihrem Hund insgesamt täglich Gassi (in Minuten)?<br>(Bitte keine Zeitspannen, sondern einen Durchschnittswert angeben)                                                                                                                    | frei                                                                                                                                                                                           |
| Wie viele Stunden verbringen Sie durchschnittlich täglich in der Gegenwart Ihres Hundes (aktiv, passiv, Tag und Nacht)?<br>(Bitte keine Zeitspannen, sondern einen Durchschnittswert angeben)                                                                     | frei                                                                                                                                                                                           |

**Table S3.** Descriptive statistics of behaviors in total of time.

| Variable      | N  | Unit    | Median | Q1    | Q3    | Mean  | STD   | Min  | Max   |
|---------------|----|---------|--------|-------|-------|-------|-------|------|-------|
| Lying resting | 17 | Percent | 42.73  | 30.63 | 71.52 | 46.87 | 27.54 | 3.76 | 90.00 |

|                         |    |         |       |       |       |       |       |      |       |
|-------------------------|----|---------|-------|-------|-------|-------|-------|------|-------|
| Lying alert             | 17 | Percent | 21.48 | 15.39 | 38.13 | 27.29 | 15.55 | 4.20 | 55.00 |
| Attention towards owner | 17 | Percent | 18.80 | 8.40  | 25.63 | 18.81 | 12.76 | 0.00 | 44.55 |
| Standing                | 17 | Percent | 10.00 | 4.03  | 16.54 | 11.40 | 7.76  | 0.62 | 27.15 |
| Walking                 | 17 | Percent | 5.04  | 2.65  | 9.38  | 10.77 | 13.90 | 1.40 | 50.00 |
| Owner physical contact  | 17 | Percent | 3.36  | 0.63  | 7.05  | 4.67  | 4.70  | 0.00 | 14.57 |
| Sitting                 | 17 | Percent | 0.00  | 0.00  | 4.38  | 3.66  | 7.54  | 0.00 | 28.57 |
| Grooming                | 17 | Percent | 0.83  | 0.00  | 4.64  | 3.28  | 5.55  | 0.00 | 21.43 |
| Chewing                 | 17 | Percent | 0.00  | 0.00  | 3.85  | 1.84  | 2.60  | 0.00 | 6.77  |
| Panting                 | 17 | Percent | 0.00  | 0.00  | 0.00  | 1.84  | 4.82  | 0.00 | 15.00 |
| Physical contact        | 17 | Percent | 0.62  | 0.00  | 2.69  | 1.75  | 2.77  | 0.00 | 9.09  |
| Exploring               | 17 | Percent | 0.00  | 0.00  | 0.00  | 1.68  | 4.74  | 0.00 | 14.29 |
| Owner verbal contact    | 17 | Percent | 0.64  | 0.00  | 1.50  | 1.49  | 2.28  | 0.00 | 7.95  |
| Following owner         | 17 | Percent | 1.32  | 0.66  | 1.92  | 1.47  | 1.38  | 0.00 | 5.71  |
| Tail wagging            | 17 | Percent | 0.66  | 0.00  | 2.01  | 1.35  | 1.66  | 0.00 | 5.00  |
| Attention towards sth.  | 17 | Percent | 0.00  | 0.00  | 0.00  | 0.83  | 2.25  | 0.00 | 7.50  |
| Body shaking            | 17 | Percent | 0.00  | 0.00  | 0.83  | 0.47  | 0.59  | 0.00 | 1.68  |
| Yawning                 | 17 | Percent | 0.00  | 0.00  | 0.67  | 0.36  | 0.53  | 0.00 | 1.99  |
| Body stretching         | 17 | Percent | 0.00  | 0.00  | 0.67  | 0.35  | 0.55  | 0.00 | 1.82  |
| Whining                 | 17 | Percent | 0.00  | 0.00  | 0.00  | 0.18  | 0.53  | 0.00 | 1.88  |
| Owner seeks contact     | 17 | Percent | 0.00  | 0.00  | 0.00  | 0.12  | 0.27  | 0.00 | 0.75  |
| Running                 | 17 | Percent | 0.00  | 0.00  | 0.00  | 0.00  | 0.00  | 0.00 | 0.00  |
| Play                    | 17 | Percent | 0.00  | 0.00  | 0.00  | 0.00  | 0.00  | 0.00 | 0.00  |
| Barking                 | 17 | Percent | 0.00  | 0.00  | 0.00  | 0.00  | 0.00  | 0.00 | 0.00  |
| Growling                | 17 | Percent | 0.00  | 0.00  | 0.00  | 0.00  | 0.00  | 0.00 | 0.00  |
| Howling                 | 17 | Percent | 0.00  | 0.00  | 0.00  | 0.00  | 0.00  | 0.00 | 0.00  |
| Lip licking             | 17 | Percent | 0.00  | 0.00  | 0.00  | 0.00  | 0.00  | 0.00 | 0.00  |
| Inviting play           | 17 | Percent | 0.00  | 0.00  | 0.00  | 0.00  | 0.00  | 0.00 | 0.00  |
| Owner invites play      | 17 | Percent | 0.00  | 0.00  | 0.00  | 0.00  | 0.00  | 0.00 | 0.00  |

**Table S4.** Descriptive statistics of behavior groups in total of time.

| Variable                       | N  | Unit    | Median | Q1    | Q3    | Mean  | STD   | Min   | Max   |
|--------------------------------|----|---------|--------|-------|-------|-------|-------|-------|-------|
| Attentive behaviour            | 17 | Percent | 55.32  | 35.71 | 64.17 | 50.74 | 23.03 | 12.50 | 90.38 |
| Interaction initiated by dog   | 17 | Percent | 24.06  | 10.08 | 28.75 | 22.04 | 13.46 | 0.00  | 48.18 |
| Physically active              | 17 | Percent | 15.38  | 6.72  | 22.52 | 20.56 | 18.78 | 2.10  | 71.43 |
| Restlessness                   | 17 | Percent | 13.64  | 11.25 | 21.15 | 16.87 | 8.85  | 5.62  | 42.86 |
| Interaction initiated by owner | 17 | Percent | 4.55   | 0.63  | 8.33  | 6.28  | 6.53  | 0.00  | 21.19 |
| Stress behaviour               | 17 | Percent | 3.36   | 1.33  | 5.71  | 4.56  | 4.60  | 0.00  | 15.83 |
| Vocalising                     | 17 | Percent | 0.00   | 0.00  | 0.00  | 0.18  | 0.53  | 0.00  | 1.88  |

**Table S5.** Comparison of behaviors of different separation durations.

| Variable      | Sep. class 1 |       | Sep. class 2 |       | Sep. class 3 |       | $\chi^2$ | P-value |
|---------------|--------------|-------|--------------|-------|--------------|-------|----------|---------|
|               | Median       | IQR   | Median       | IQR   | Median       | IQR   |          |         |
| PeS           |              |       |              |       |              |       |          |         |
| Lying alert   | 85.00        | 70.71 | 15.00        | 55.00 | 32.50        | 58.91 | 5.20     | 0.074   |
| Lying resting | 15.00        | 22.58 | 78.26        | 50.00 | 29.15        | 46.67 | 6.50     | 0.039   |
| Standing      | 0.00         | 5.56  | 0.00         | 13.04 | 15.00        | 23.13 | 1.40     | 0.497   |
| Walking       | 0.00         | 3.03  | 0.00         | 0.00  | 5.78         | 8.78  | 2.00     | 0.368   |



|                         |        |       |       |       |       |       |      |       |
|-------------------------|--------|-------|-------|-------|-------|-------|------|-------|
| Attention towards sth.  | 0.00   | 0.00  | 0.00  | 0.00  | 0.00  | 0.00  | 2.00 | 0.368 |
| Grooming                | 0.00   | 0.00  | 0.00  | 0.00  | 0.00  | 0.00  | 2.00 | 0.368 |
| Chewing                 | 0.00   | 5.56  | 0.00  | 0.00  | 0.00  | 16.88 | 4.00 | 0.135 |
| Panting                 | 0.00   | 0.00  | 0.00  | 0.00  | 0.00  | 0.00  | 2.00 | 0.368 |
| Whining                 | 0.00   | 0.00  | 0.00  | 0.00  | 0.00  | 0.00  | 2.00 | 0.368 |
| Yawning                 | 0.00   | 0.00  | 0.00  | 0.00  | 0.00  | 0.00  | 2.00 | 0.368 |
| Body stretching         | 0.00   | 0.00  | 0.00  | 0.00  | 0.00  | 0.00  | 2.00 | 0.368 |
| Following owner         | 0.00   | 2.78  | 0.00  | 0.00  | 1.61  | 7.06  | 2.60 | 0.273 |
| Attention towards owner | 77.42  | 75.91 | 11.54 | 6.30  | 46.33 | 17.46 | 2.80 | 0.247 |
| Owner physical contact  | 0.00   | 2.50  | 0.00  | 3.85  | 0.00  | 0.00  | 2.60 | 0.273 |
| Owner verbal contact    | 0.00   | 2.78  | 0.00  | 0.00  | 0.00  | 0.00  | 2.00 | 0.368 |
| Owner seeks contact     | 0.00   | 0.00  | 0.00  | 0.00  | 0.00  | 0.00  | 2.00 | 0.368 |
| Restlessness            | 8.33   | 6.59  | 5.00  | 2.50  | 12.92 | 15.48 | 2.21 | 0.331 |
| Physically active       | 6.06   | 13.89 | 0.00  | 11.54 | 23.33 | 27.53 | 6.00 | 0.050 |
| Attentive behaviour     | 105.00 | 76.45 | 30.00 | 74.46 | 83.75 | 68.17 | 3.60 | 0.165 |
| Interaction by dog      | 77.42  | 72.88 | 11.54 | 6.30  | 47.94 | 17.10 | 2.80 | 0.247 |
| Interaction by owner    | 2.50   | 5.56  | 0.00  | 3.85  | 0.00  | 3.75  | 1.27 | 0.529 |
| Vocalising              | 0.00   | 0.00  | 0.00  | 0.00  | 0.00  | 0.00  | 2.00 | 0.368 |
| Stress behaviour        | 0.00   | 2.50  | 0.00  | 0.00  | 0.00  | 1.88  | 0.50 | 0.779 |

---

E2

---

L1

|                         |       |       |       |       |       |       |      |       |
|-------------------------|-------|-------|-------|-------|-------|-------|------|-------|
| Grooming                | 0.00  | 0.00  | 0.00  | 0.00  | 0.00  | 0.00  | 2.00 | 0.368 |
| Panting                 | 0.00  | 0.00  | 0.00  | 0.00  | 0.00  | 0.00  | 2.00 | 0.368 |
| Yawning                 | 0.00  | 0.00  | 0.00  | 0.00  | 0.00  | 0.00  | 2.00 | 0.368 |
| Body stretching         | 0.00  | 0.00  | 0.00  | 5.00  | 0.00  | 0.00  | 4.00 | 0.135 |
| Body shaking            | 0.00  | 0.00  | 0.00  | 5.00  | 0.00  | 0.00  | 4.00 | 0.135 |
| Restlessness            | 5.00  | 5.00  | 10.00 | 10.00 | 5.00  | 5.00  | 0.93 | 0.627 |
| Physically active       | 0.00  | 0.00  | 0.00  | 0.00  | 0.00  | 40.00 | 3.71 | 0.156 |
| Attentive behaviour     | 0.00  | 0.00  | 0.00  | 30.00 | 0.00  | 10.00 | 3.00 | 0.223 |
| Stress behaviour        | 0.00  | 0.00  | 0.00  | 15.00 | 0.00  | 0.00  | 2.00 | 0.368 |
| <b>L2</b>               |       |       |       |       |       |       |      |       |
| Lying alert             | 25.00 | 30.00 | 35.00 | 40.00 | 45.00 | 60.00 | 0.43 | 0.807 |
| Lying resting           | 65.00 | 20.00 | 65.00 | 70.00 | 55.00 | 80.00 | 1.08 | 0.584 |
| Standing                | 0.00  | 0.00  | 0.00  | 0.00  | 0.00  | 10.00 | 2.00 | 0.368 |
| Walking                 | 0.00  | 0.00  | 0.00  | 10.00 | 0.00  | 0.00  | 3.00 | 0.223 |
| Attention towards sth.  | 0.00  | 0.00  | 0.00  | 0.00  | 0.00  | 0.00  | 2.00 | 0.368 |
| Grooming                | 0.00  | 0.00  | 5.00  | 25.00 | 0.00  | 0.00  | 4.00 | 0.135 |
| Tail wagging            | 0.00  | 0.00  | 0.00  | 0.00  | 0.00  | 0.00  | 2.00 | 0.368 |
| Body stretching         | 0.00  | 0.00  | 0.00  | 0.00  | 0.00  | 0.00  | 4.00 | 0.135 |
| Restlessness            | 5.00  | 5.00  | 5.00  | 5.00  | 5.00  | 15.00 | 2.71 | 0.257 |
| Physically active       | 0.00  | 0.00  | 10.00 | 30.00 | 0.00  | 10.00 | 5.00 | 0.082 |
| Attentive behaviour     | 35.00 | 15.00 | 35.00 | 45.00 | 45.00 | 60.00 | 0.43 | 0.807 |
| Stress behaviour        | 0.00  | 0.00  | 0.00  | 0.00  | 0.00  | 0.00  | 2.00 | 0.368 |
| <b>PoS</b>              |       |       |       |       |       |       |      |       |
| Lying alert             | 32.50 | 11.67 | 10.00 | 35.00 | 15.00 | 4.40  | 2.80 | 0.247 |
| Lying resting           | 15.00 | 20.00 | 46.15 | 62.50 | 8.85  | 62.45 | 4.00 | 0.135 |
| Sitting                 | 0.00  | 17.50 | 0.00  | 0.00  | 0.00  | 0.00  | 2.00 | 0.368 |
| Standing                | 39.13 | 25.00 | 14.29 | 20.58 | 24.01 | 25.88 | 3.26 | 0.196 |
| Walking                 | 10.00 | 9.89  | 22.50 | 23.27 | 21.59 | 31.50 | 3.11 | 0.211 |
| Grooming                | 0.00  | 0.00  | 0.00  | 0.00  | 0.00  | 0.00  | 2.00 | 0.368 |
| Chewing                 | 2.50  | 10.00 | 0.00  | 0.00  | 0.00  | 1.88  | 3.80 | 0.150 |
| Panting                 | 0.00  | 0.00  | 0.00  | 0.00  | 0.00  | 0.00  | 2.00 | 0.368 |
| Tail wagging            | 2.50  | 8.70  | 0.00  | 5.00  | 6.42  | 11.34 | 0.67 | 0.717 |
| Whining                 | 0.00  | 0.00  | 0.00  | 0.00  | 0.00  | 0.00  | 2.00 | 0.368 |
| Yawning                 | 2.50  | 3.33  | 0.00  | 0.00  | 0.00  | 0.00  | 2.92 | 0.232 |
| Body stretching         | 0.00  | 0.00  | 0.00  | 0.00  | 0.00  | 0.00  | 2.00 | 0.368 |
| Body shaking            | 2.50  | 4.35  | 0.00  | 7.14  | 0.00  | 0.00  | 2.92 | 0.232 |
| Following owner         | 5.00  | 2.50  | 7.14  | 10.00 | 5.95  | 12.01 | 0.93 | 0.627 |
| Physical contact        | 0.00  | 4.35  | 2.50  | 7.14  | 8.15  | 14.07 | 1.73 | 0.420 |
| Attention towards owner | 60.00 | 7.50  | 50.00 | 44.42 | 32.23 | 38.50 | 0.95 | 0.623 |
| Owner physical contact  | 25.00 | 33.62 | 7.69  | 11.79 | 18.62 | 35.31 | 5.20 | 0.074 |
| Owner verbal contact    | 0.00  | 4.35  | 7.14  | 7.50  | 3.45  | 7.35  | 0.55 | 0.761 |
| Owner seeks contact     | 0.00  | 2.50  | 0.00  | 0.00  | 0.00  | 0.00  | 4.00 | 0.135 |
| Restlessness            | 30.00 | 10.00 | 22.50 | 22.86 | 36.29 | 28.25 | 0.74 | 0.692 |
| Physically active       | 30.00 | 22.50 | 37.50 | 31.15 | 49.31 | 47.06 | 1.20 | 0.549 |
| Attentive behaviour     | 95.00 | 28.04 | 82.50 | 23.08 | 78.46 | 65.05 | 2.80 | 0.247 |
| Interaction by dog      | 70.00 | 22.50 | 65.00 | 28.02 | 70.96 | 23.93 | 0.74 | 0.692 |
| Interaction by owner    | 27.50 | 29.28 | 21.43 | 35.96 | 22.07 | 47.19 | 1.20 | 0.549 |
| Vocalising              | 0.00  | 0.00  | 0.00  | 0.00  | 0.00  | 0.00  | 2.00 | 0.368 |
| Stress behaviour        | 7.50  | 9.71  | 12.50 | 7.31  | 9.40  | 13.45 | 0.11 | 0.946 |

**Table S6.** Effect sizes and p-values on SRB status.

| Variable                       | Effect size | Strength   | P-value   | Method            |
|--------------------------------|-------------|------------|-----------|-------------------|
| General information            |             |            |           |                   |
| Gender                         | 0.017       | negligible | 0.631     | Chi2 & CramersV   |
| Status                         | 0.041       | negligible | 0.580     | Fisher & CramersV |
| Age                            | 0.008       | negligible | 0.820     | MWU & R           |
| Breed                          | 0.097       | negligible | 0.005**   | Chi2 & CramersV   |
| Height                         | 0.204       | small      | 0.080     | Welch & CohensD   |
| Weight                         | 0.253       | small      | 0.021*    | Welch & CohensD   |
| Background                     | 0.131       | small      | 0.017*    | Fisher & CramersV |
| Shelter                        | 0.111       | small      | 0.001**   | Chi2 & CramersV   |
| Time in shelter                | 0.167       | small      | 0.012*    | MWU & R           |
| Time with owner                | 0.090       | negligible | 0.008**   | MWU & R           |
| Number of owners               | 0.033       | negligible | 0.344     | MWU & R           |
| Adoption age                   | 0.004       | negligible | 0.900     | MWU & R           |
| Gender owner                   | 0.016       | negligible | 1         | Fisher & CramersV |
| Age owner                      | 0.086       | negligible | 0.011*    | MWU & R           |
| Men in household               | 0.090       | negligible | 0.513     | Welch & CohensD   |
| Women in household             | 0.022       | negligible | 0.833     | Welch & CohensD   |
| Children in household          | 0.122       | negligible | 0.331     | Welch & CohensD   |
| Living environment             | 0.000       | negligible | 1         | Chi2 & CramersV   |
| Garden                         | 0.020       | negligible | 0.547     | Chi2 & CramersV   |
| Other pet                      | 0.077       | negligible | 0.023*    | Chi2 & CramersV   |
| Dog                            | 0.001       | negligible | 1         | Fisher & CramersV |
| Cat                            | 0.069       | negligible | 0.045*    | Chi2 & CramersV   |
| Rodent                         | 0.048       | negligible | 0.158     | Chi2 & CramersV   |
| Bird                           | 0.020       | negligible | 0.558     | Chi2 & CramersV   |
| Horse & Cattle                 | 0.078       | negligible | 0.019*    | Fisher & CramersV |
| Sheep & Goat                   | 0.000       | negligible | 0.532     | Fisher & CramersV |
| Fish                           | 0.000       | negligible | 1         | Fisher & CramersV |
| Reptiles                       | 0.000       | negligible | 0.675     | Fisher & CramersV |
| Changes                        | 0.051       | negligible | 0.135     | Chi2 & CramersV   |
| Working hours                  | 0.020       | negligible | 0.555     | Chi2 & CramersV   |
| Moving                         | 0.016       | negligible | 0.643     | Chi2 & CramersV   |
| New family member              | 0.048       | negligible | 0.153     | Chi2 & CramersV   |
| Loss family member             | 0.022       | negligible | 0.511     | Chi2 & CramersV   |
| Health                         | 0.002       | negligible | 0.646     | Fisher & CramersV |
| Less activity                  | 0.017       | negligible | 0.617     | Chi2 & CramersV   |
| More activity                  | 0.000       | negligible | 1         | Fisher & CramersV |
| New owner                      | 0.005       | negligible | 0.634     | Fisher & CramersV |
| Other change                   | 0.051       | negligible | 0.077     | Fisher & CramersV |
| Separation information         |             |            |           |                   |
| Separation frequency           | 0.287       | small      | 0.009**   | Welch & CohensD   |
| Separation period              | 0.134       | small      | < .001*** | MWU & R           |
| Maximum separation             | 0.111       | small      | < .001*** | MWU & R           |
| Walking time prior             | 0.082       | negligible | 0.434     | Welch & CohensD   |
| Time between walk & separation | 0.031       | negligible | 0.358     | MWU & R           |
| Leaving                        |             |            |           |                   |
| Leaving ritual                 | 0.071       | negligible | 0.036*    | Chi2 & CramersV   |
| Variable                       | Effect size | Strength   | P-value   | Method            |

|                                 |                    |                 |                |                   |
|---------------------------------|--------------------|-----------------|----------------|-------------------|
| Type of leaving ritual          | 0.092              | negligible      | 0.071          | Fisher & CramersV |
| Intensity leaving ritual        | 0.012              | negligible      | 0.722          | MWU & R           |
| Worries owner during separation | 0.216              | small           | < .001***      | MWU & R           |
| Worries dog during separation   | 0.384              | medium          | < .001***      | MWU & R           |
| Separation location             |                    |                 |                |                   |
| Inside                          | 0.099              | negligible      | 0.007**        | Fisher & CramersV |
| Outside                         | 0.008              | negligible      | 0.809          | Chi2 & CramersV   |
| Property                        | 0.023              | negligible      | 0.492          | Chi2 & CramersV   |
| Outside kennel                  | 0.019              | negligible      | 0.611          | Fisher & CramersV |
| Inside kennel                   | 0.082              | negligible      | 0.014*         | Fisher & CramersV |
| One room                        | 0.106              | small           | 0.002**        | Chi2 & CramersV   |
| Several rooms                   | 0.160              | small           | < .001**       | Chi2 & CramersV   |
| Exercise during separation      | 0.135              | small           | 0.093          | Chi2 & CramersV   |
| Toy                             | 0.116              | small           | < .001***      | Chi2 & CramersV   |
| Food                            | 0.123              | small           | < .001***      | Chi2 & CramersV   |
| Other pet during separation     | 0.037              | negligible      | 0.277          | Chi2 & CramersV   |
| Dog                             | 0.008              | negligible      | 0.808          | Chi2 & CramersV   |
| Cat                             | 0.062              | negligible      | 0.025*         | Chi2 & CramersV   |
| Bird                            | 0.000              | negligible      | 1              | Fisher & CramersV |
| Reptile                         | 0.045              | negligible      | 0.102          | Fisher & CramersV |
| Rodent                          | 0.000              | negligible      | 1              | Fisher & CramersV |
| Symptoms                        |                    |                 |                |                   |
| Whining                         | 0.426              | medium          | < .001***      | MWU & R           |
| Barking                         | 0.350              | medium          | < .001***      | MWU & R           |
| Howling                         | 0.363              | medium          | < .001***      | MWU & R           |
| Urination                       | 0.077              | negligible      | 0.024*         | MWU & R           |
| Defecation                      | 0.067              | negligible      | 0.048*         | MWU & R           |
| Destruction                     | 0.174              | small           | < .001***      | MWU & R           |
| Salivation                      | 0.328              | medium          | < .001***      | MWU & R           |
| Shaking                         | 0.297              | small           | < .001***      | MWU & R           |
| Restlessness                    | 0.486              | medium          | < .001***      | MWU & R           |
| Growling                        | 0.121              | small           | < .001***      | MWU & R           |
| Excitement                      | 0.473              | medium          | < .001***      | MWU & R           |
| Lip licking                     | 0.357              | medium          | < .001***      | MWU & R           |
| Yawning                         | 0.261              | small           | < .001***      | MWU & R           |
| Escape behaviour                | 0.280              | small           | < .001***      | MWU & R           |
| Greeting                        |                    |                 |                |                   |
| Greeting ritual                 | 0.107              | small           | 0.002**        | Chi2 & CramersV   |
| Type of ritual                  | 0.121              | small           | 0.005**        | Chi2 & CramersV   |
| Intensity greeting owner        | 0.083              | negligible      | 0.014*         | MWU & R           |
| Intensity greeting dog short    | 0.164              | small           | < .001***      | MWU & R           |
| Intensity greeting dog long     | 0.192              | small           | < .001***      | MWU & R           |
| Time to relaxation              | 0.936              | large           | < .001***      | Welch & CohensD   |
| Habituation                     | 0.036              | negligible      | 0.287          | Chi2 & CramersV   |
| Daily walking                   | 0.082              | negligible      | 0.393          | Welch & CohensD   |
| Presence of owner               | 0.236              | small           | 0.046*         | Welch & CohensD   |
| Separation mother               | 0.055              | negligible      | 0.162          | MWU & R           |
| Age first separation from owner | 0.034              | negligible      | 0.336          | MWU & R           |
| Phobia                          | 0.014              | negligible      | 0.675          | Chi2 & CramersV   |
| <b>Variable</b>                 | <b>Effect size</b> | <b>Strength</b> | <b>P-value</b> | <b>Method</b>     |
| Thunderstorm                    | 0.000              | negligible      | 0.989          | Chi2 & CramersV   |

|                       |       |            |           |                   |
|-----------------------|-------|------------|-----------|-------------------|
| Noise                 | 0.015 | negligible | 0.657     | Chi2 & CramersV   |
| Humans                | 0.055 | negligible | 0.071     | Fisher & CramersV |
| Dogs                  | 0.001 | negligible | 1         | Fisher & CramersV |
| Objects               | 0.022 | negligible | 0.500     | Fisher & CramersV |
| Environments          | 0.027 | negligible | 0.193     | Fisher & CramersV |
| Vehicles              | 0.012 | negligible | 0.711     | Fisher & CramersV |
| Surfaces              | 0.000 | negligible | 0.478     | Fisher & CramersV |
| Separation            | 0.078 | negligible | 0.029*    | Fisher & CramersV |
| Others                | 0.065 | negligible | 0.037*    | Fisher & CramersV |
| Attachment            |       |            |           |                   |
| People substituting   | 0.107 | negligible | 0.374     | Welch & CohensD   |
| Animal welfare        | 0.118 | negligible | 0.300     | Welch & CohensD   |
| General attachment    | 0.155 | negligible | 0.194     | Welch & CohensD   |
| Total attachment      | 0.003 | negligible | 0.981     | Welch & CohensD   |
| Personality           |       |            |           |                   |
| Trainability          | 0.180 | negligible | 0.130     | Welch & CohensD   |
| Boldness              | 0.026 | negligible | 0.834     | Welch & CohensD   |
| Sociability           | 0.026 | negligible | 0.937     | Welch & CohensD   |
| Calmness              | 0.723 | medium     | < .001*** | Welch & CohensD   |
| Emotional disposition |       |            |           |                   |
| Pessimism             | 0.672 | medium     | < .001*** | Welch & CohensD   |
| Pos. Activation       | 0.654 | medium     | < .001*** | Welch & CohensD   |
| Interest              | 0.122 | negligible | 0.296     | Welch & CohensD   |
| Excitability          | 0.788 | medium     | < .001*** | Welch & CohensD   |
| Persistence           | 0.612 | medium     | < .001*** | Welch & CohensD   |
